# Supplementary material for: Assessing the Molecular Targets and Mode of Action of Furanone C-30 on Pseudomonas aeruginosa Quorum Sensing
Source: PubMed Central journal article supplement (PMC7998126; doi:10.3390/molecules26061620), 2021-03-15
Supplement: molecules-26-01620-s001.pdf [file molecules-26-01620-s001.pdf]

Supplementary

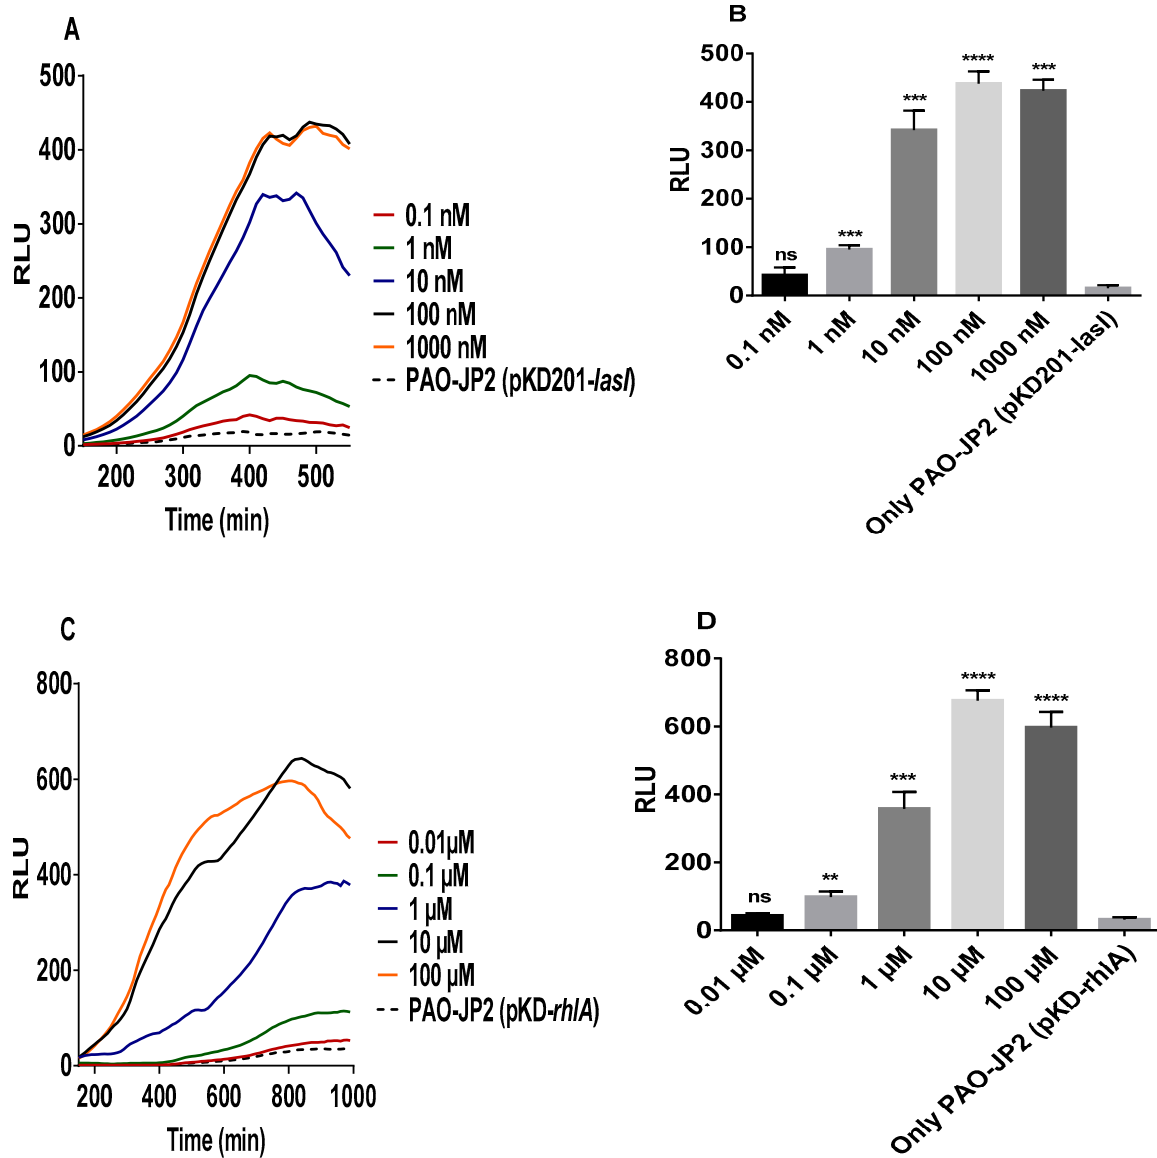

**Figure S1.** Induction of bioluminescence. **(A)** Bioluminescence emission of PAO-JP2 (pKD201-*lasI*) in the presence of different concentrations of 3-oxo-C12-HSL. **(B)** Bioluminescence induction relative to the control, corresponding to the data in panel A. **(C)** PAO-JP2 (pKD-*rhlA*) luminescence in the presence of different concentrations of C4-HSL. **(D)** Bioluminescence induction relative to the control, corresponding to the data in panel C. All concentrations presented are the final concentrations. Luminescence was expressed as relative light units or RLU. \*\*  $p < 0.01$ , \*\*\*  $p < 0.001$ , \*\*\*\*  $p < 0.0001$ , and *ns* not significant. Values represent mean  $\pm$  SD,  $n = 3$  (three experimental readings).
